# Supplementary material for: Fabrication of sub-20 nm patterns using dopamine chemistry in self-aligned double patterning
Source: Royal Society of Chemistry journal article supplement (doi:10.1039/c8nr04040k), 2018-01-01
Supplement: c8nr04040k1.pdf [file c8nr04040k1.pdf]

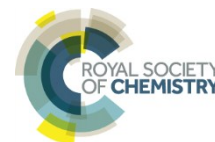

Nanoscale

Supplementary Information

**Fabrication of Sub-20 nm Patterns using Dopamine Chemistry in Self-Aligned Double Patterning**

Received 00th January 20xx,  
Accepted 00th January 20xx

Yinyong Li,<sup>a</sup> Jaewon Choi,<sup>a</sup> Zhiwei Sun,<sup>a</sup> Thomas Russell,<sup>a\*</sup> and Kenneth R. Carter<sup>a\*</sup>

DOI: 10.1039/x0xx00000x

[www.rsc.org/](http://www.rsc.org/)

---

<sup>a</sup> Department of Polymer Science and Engineering, University of Massachusetts – Amherst, 120, Governors Drive, Massachusetts, 01003, United States  
Email: [Russell@mail.pse.umass.edu](mailto:Russell@mail.pse.umass.edu); [kr Carter@polysci.umass.edu](mailto:kr Carter@polysci.umass.edu).

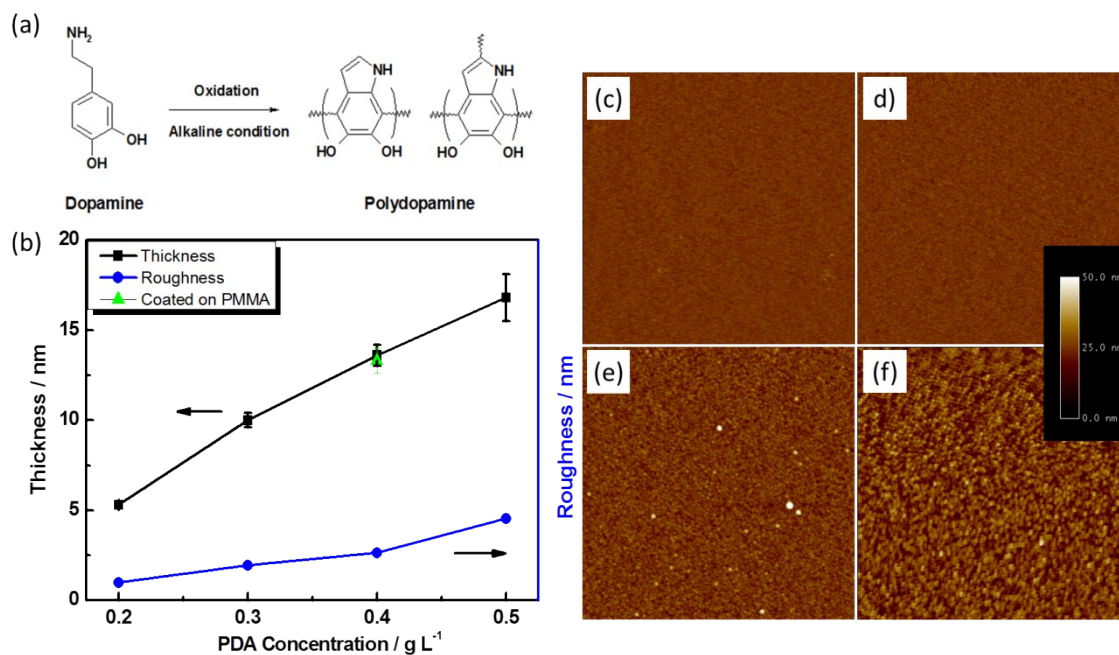

**Fig. S1** Polydopamine coatings. (a) Schematic illustration of self-polymerization of dopamine under alkaline conditions; (b) Plot of coating thickness (black squares) and surface roughness (blue circles) of PDA film coated on silicon wafer with respect to dopamine concentration, green triangle is the thickness of PDA coated on PMMA; It is worth noting that the coating thicknesses of film coated on silicon substrate (13.6 nm) or PMMA coated silicon substrate (13.3 nm) are similar to each other (Figure S1b), indicating the coating thickness is independent of substrates in this study; and AFM height images of coated surface with different dopamine concentrations: (c) 0.2 mg·mL<sup>-1</sup>, (d) 0.3 mg·mL<sup>-1</sup>, (e) 0.4 mg·mL<sup>-1</sup> and (f) 0.5 mg·mL<sup>-1</sup>.

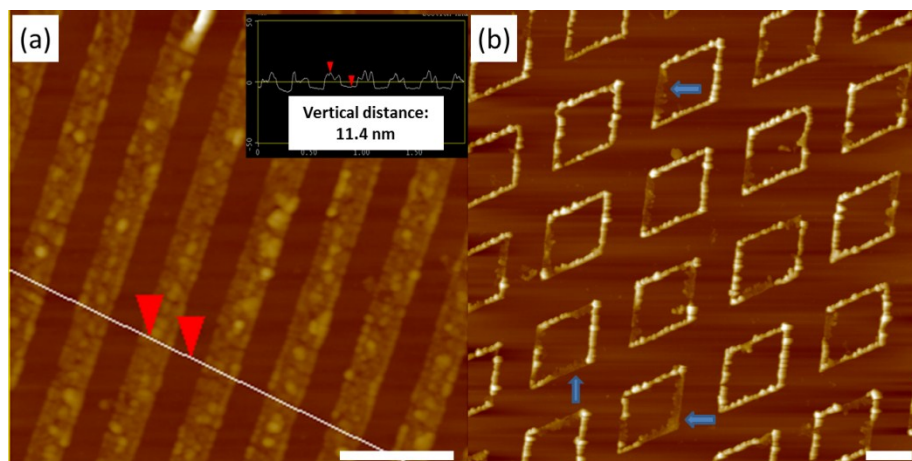

**Fig. S2** AFM height images of collapsed (a) PDA line patterns and (b) PDA rhombic patterns achieved after 1 coating cycle and removal of the PMMA template. Inset in (a) is the surface profile of the collapsed line patterns and arrows in (b) indicate the collapsed region of rhombic rings. Scale bars represent 500 nm.

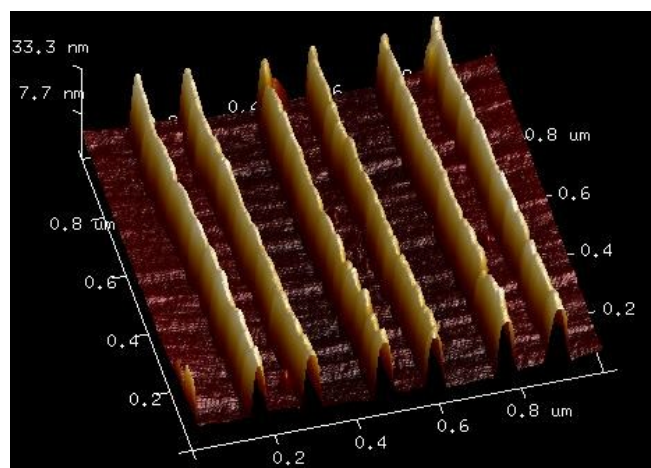

**Fig. S3** 3D AFM height image of SiO<sub>2</sub> lines after plasma etching.

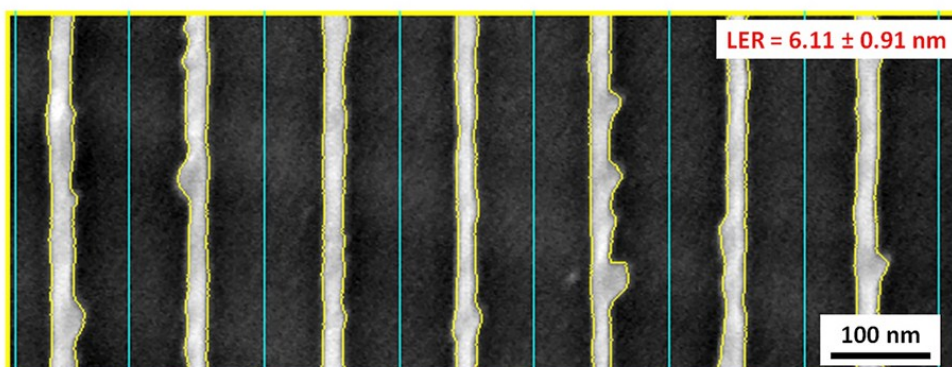

**Fig. S4** Measurement of line edge roughness, analysed by SuMMIT software.

**Table S1** Comparison of etching rate of PDA, PMMA, and silicon dioxide. Etching condition: O<sub>2</sub> plasma etching (pressure: 4 mTorr, power: 40 W, O<sub>2</sub> flow rate: 50 sccm); CHF<sub>3</sub> plasma etching (pressure: 5 mTorr, power: 150 W, CHF<sub>3</sub> flow rate: 10 sccm).

| Materials        | O <sub>2</sub> Plasma Etching Rate (nm/min) | CHF <sub>3</sub> Plasma Etching Rate (nm/min) |
|------------------|---------------------------------------------|-----------------------------------------------|
| PDA              | 15 ± 3                                      | 3.7 ± 0.3                                     |
| PMMA             | 31 ± 3                                      | 4.8 ± 0.4                                     |
| SiO <sub>2</sub> | N/A                                         | 9.0 ± 0.3                                     |
